# Supplementary material
Source: PubMed Central journal article supplement (PMC3339384)
Supplement: Supp_Data.pdf [file Supp_Data.pdf]

## Supplementary Data

SUPPLEMENTARY TABLE S1. THE EXPRESSION OF NDRG4  
IN TCGA'S GBM TISSUES COMPARED  
TO NORMAL BRAIN TISSUES

| <i>Participant</i> | <i>AgilentG4502A_07<br/>log2 tumor/normal ratio</i> |
|--------------------|-----------------------------------------------------|
| TCGA-02-0001       | -1.395                                              |
| TCGA-02-0003       | -1.692                                              |
| TCGA-02-0004       | -3.594                                              |
| TCGA-02-0006       | -2.596                                              |
| TCGA-02-0007       | -1.829                                              |
| TCGA-02-0009       | -2.826                                              |
| TCGA-02-0010       | -3.292                                              |
| TCGA-02-0011       | -1.876                                              |
| TCGA-02-0014       | -3.603                                              |
| TCGA-02-0015       | -3.385                                              |
| TCGA-02-0016       | -2.165                                              |
| TCGA-02-0021       | -2.61                                               |
| TCGA-02-0023       | -2.507                                              |
| TCGA-02-0024       | -2.409                                              |
| TCGA-02-0025       | -4.466                                              |
| TCGA-02-0026       | -2.3                                                |
| TCGA-02-0027       | -2.038                                              |
| TCGA-02-0028       | -2.449                                              |
| TCGA-02-0033       | -4.651                                              |
| TCGA-02-0034       | -2.625                                              |
| TCGA-02-0037       | -3.479                                              |
| TCGA-02-0038       | -2.03                                               |
| TCGA-02-0039       | -1.508                                              |
| TCGA-02-0043       | -3.174                                              |
| TCGA-02-0046       | -2.016                                              |
| TCGA-02-0047       | -1.231                                              |
| TCGA-02-0048       | -1.837                                              |
| TCGA-02-0051       | -4.307                                              |
| TCGA-02-0052       | -2.887                                              |
| TCGA-02-0054       | -0.52                                               |
| TCGA-02-0055       | -4.64                                               |
| TCGA-02-0057       | -1.795                                              |
| TCGA-02-0058       | -2.068                                              |
| TCGA-02-0059       | -4.345                                              |
| TCGA-02-0060       | -2.278                                              |
| TCGA-02-0064       | -1.975                                              |
| TCGA-02-0068       | -3.164                                              |
| TCGA-02-0069       | -1.518                                              |
| TCGA-02-0070       | -2.093                                              |
| TCGA-02-0071       | -2.294                                              |
| TCGA-02-0074       | -2.378                                              |
| TCGA-02-0075       | -2.81                                               |
| TCGA-02-0079       | -2.034                                              |
| TCGA-02-0080       | -0.849                                              |
| TCGA-02-0083       | -2.03                                               |
| TCGA-02-0084       | -2.098                                              |
| TCGA-02-0085       | -0.857                                              |
| TCGA-02-0086       | -1.111                                              |
| TCGA-02-0087       | -2.039                                              |
| TCGA-02-0089       | -1.106                                              |
| TCGA-02-0099       | -2.197                                              |
| TCGA-02-0102       | -1.27                                               |
| TCGA-02-0104       | -3.396                                              |
| TCGA-02-0106       | -3.412                                              |
| TCGA-02-0107       | -1.588                                              |
| TCGA-02-0111       | -3.247                                              |
| TCGA-02-0114       | -2.928                                              |

SUPPLEMENTARY TABLE S1. (CONTINUED)

| <i>Participant</i> | <i>AgilentG4502A_07<br/>log2 tumor/normal ratio</i> |
|--------------------|-----------------------------------------------------|
| TCGA-02-0115       | -1.136                                              |
| TCGA-02-0116       | -0.839                                              |
| TCGA-02-0258       | -1.193                                              |
| TCGA-02-0260       | -2.828                                              |
| TCGA-02-0266       | -2.822                                              |
| TCGA-02-0269       | -2.352                                              |
| TCGA-02-0271       | -2.054                                              |
| TCGA-02-0281       | -2.517                                              |
| TCGA-02-0285       | -2.61                                               |
| TCGA-02-0289       | -0.619                                              |
| TCGA-02-0290       | -2.739                                              |
| TCGA-02-0317       | -2.473                                              |
| TCGA-02-0321       | -3.223                                              |
| TCGA-02-0324       | -2.41                                               |
| TCGA-02-0325       | -1.728                                              |
| TCGA-02-0326       | -2.226                                              |
| TCGA-02-0330       | -1.184                                              |
| TCGA-02-0332       | -3.339                                              |
| TCGA-02-0333       | -2.105                                              |
| TCGA-02-0337       | -3.376                                              |
| TCGA-02-0338       | -2.089                                              |
| TCGA-02-0339       | -1.967                                              |
| TCGA-02-0422       | -2.099                                              |
| TCGA-02-0430       | -2.215                                              |
| TCGA-02-0432       | -1.408                                              |
| TCGA-02-0439       | -1.767                                              |
| TCGA-02-0440       | -2.463                                              |
| TCGA-02-0446       | -2.044                                              |
| TCGA-02-0451       | -2.762                                              |
| TCGA-02-0456       | -4.821                                              |
| TCGA-02-2466       | -2.145                                              |
| TCGA-02-2470       | -0.875                                              |
| TCGA-02-2483       | -2.233                                              |
| TCGA-02-2485       | -1.448                                              |
| TCGA-02-2486       | -3.296                                              |
| TCGA-06-0122       | -2.24                                               |
| TCGA-06-0124       | -2.41                                               |
| TCGA-06-0125       | -1.072                                              |
| TCGA-06-0126       | -0.931                                              |
| TCGA-06-0127       | -1.502                                              |
| TCGA-06-0128       | -1.276                                              |
| TCGA-06-0129       | -1.821                                              |
| TCGA-06-0130       | -4.474                                              |
| TCGA-06-0132       | -1.65                                               |
| TCGA-06-0133       | -1.428                                              |
| TCGA-06-0137       | -1.852                                              |
| TCGA-06-0138       | -0.906                                              |
| TCGA-06-0139       | -4.54                                               |
| TCGA-06-0143       | -1.308                                              |
| TCGA-06-0145       | -2.64                                               |
| TCGA-06-0146       | -2.369                                              |
| TCGA-06-0147       | -2.837                                              |
| TCGA-06-0148       | -2.551                                              |
| TCGA-06-0149       | -2.787                                              |
| TCGA-06-0152       | -2.781                                              |
| TCGA-06-0154       | -3.396                                              |
| TCGA-06-0155       | -2.843                                              |
| TCGA-06-0156       | -3.033                                              |
| TCGA-06-0157       | -0.796                                              |

(continued)

SUPPLEMENTARY TABLE S1. (CONTINUED)

| <i>Participant</i> | <i>AgilentG4502A_07</i><br><i>log2 tumor/normal ratio</i> |
|--------------------|-----------------------------------------------------------|
| TCGA-06-0158       | -1.523                                                    |
| TCGA-06-0162       | -1.609                                                    |
| TCGA-06-0164       | -3.539                                                    |
| TCGA-06-0166       | -2.014                                                    |
| TCGA-06-0168       | -1.966                                                    |
| TCGA-06-0169       | -2.322                                                    |
| TCGA-06-0171       | -2.906                                                    |
| TCGA-06-0173       | -2.103                                                    |
| TCGA-06-0174       | -2                                                        |
| TCGA-06-0175       | -2.375                                                    |
| TCGA-06-0176       | -3.991                                                    |
| TCGA-06-0177       | -2.355                                                    |
| TCGA-06-0179       | -2.397                                                    |
| TCGA-06-0182       | -2.672                                                    |
| TCGA-06-0184       | -2.257                                                    |
| TCGA-06-0185       | -1.942                                                    |
| TCGA-06-0187       | -2.076                                                    |
| TCGA-06-0188       | -1.28                                                     |
| TCGA-06-0189       | -3.394                                                    |
| TCGA-06-0190       | -3.45                                                     |
| TCGA-06-0192       | -2.574                                                    |
| TCGA-06-0194       | -2.5                                                      |
| TCGA-06-0195       | -2.342                                                    |
| TCGA-06-0197       | -4.308                                                    |
| TCGA-06-0201       | -6.16                                                     |
| TCGA-06-0206       | -4.577                                                    |
| TCGA-06-0209       | -3.286                                                    |
| TCGA-06-0210       | -2.748                                                    |
| TCGA-06-0211       | -2.753                                                    |
| TCGA-06-0213       | -3.459                                                    |
| TCGA-06-0214       | -3.233                                                    |
| TCGA-06-0216       | -2.118                                                    |
| TCGA-06-0219       | -3.4                                                      |
| TCGA-06-0221       | -2.297                                                    |
| TCGA-06-0237       | -1.53                                                     |
| TCGA-06-0238       | -2.533                                                    |
| TCGA-06-0241       | -2.325                                                    |
| TCGA-06-0394       | -2.725                                                    |
| TCGA-06-0397       | -3.022                                                    |
| TCGA-06-0402       | -3.487                                                    |
| TCGA-06-0409       | -1.895                                                    |
| TCGA-06-0410       | -2.412                                                    |
| TCGA-06-0412       | -2.97                                                     |
| TCGA-06-0413       | -2.308                                                    |
| TCGA-06-0414       | -2.522                                                    |
| TCGA-06-0644       | -3.299                                                    |
| TCGA-06-0645       | -3.19                                                     |
| TCGA-06-0646       | -2.399                                                    |
| TCGA-06-0648       | -1.783                                                    |
| TCGA-06-0649       | -2.133                                                    |
| TCGA-06-0686       | -2.146                                                    |
| TCGA-06-0743       | -1.534                                                    |
| TCGA-06-0744       | -2.349                                                    |
| TCGA-06-0745       | -2.574                                                    |
| TCGA-06-0747       | -1.936                                                    |
| TCGA-06-0749       | -1.589                                                    |
| TCGA-06-0750       | -1.792                                                    |
| TCGA-06-0875       | -2.565                                                    |
| TCGA-06-0876       | -2.942                                                    |
| TCGA-06-0877       | -1.904                                                    |
| TCGA-06-0878       | -2.695                                                    |
| TCGA-06-0879       | -2.134                                                    |

SUPPLEMENTARY TABLE S1. (CONTINUED)

| <i>Participant</i> | <i>AgilentG4502A_07</i><br><i>log2 tumor/normal ratio</i> |
|--------------------|-----------------------------------------------------------|
| TCGA-06-0881       | -4.664                                                    |
| TCGA-06-0882       | -2.176                                                    |
| TCGA-06-1084       | -2.463                                                    |
| TCGA-06-1086       | -1.289                                                    |
| TCGA-06-1087       | -2.167                                                    |
| TCGA-06-1800       | -1.558                                                    |
| TCGA-06-1802       | -1.629                                                    |
| TCGA-06-1805       | -1.31                                                     |
| TCGA-06-2557       | -2.187                                                    |
| TCGA-06-2558       | -1.201                                                    |
| TCGA-06-2559       | -1.791                                                    |
| TCGA-06-2561       | -0.649                                                    |
| TCGA-06-2562       | -1.441                                                    |
| TCGA-06-2563       | -1.711                                                    |
| TCGA-06-2564       | -1.606                                                    |
| TCGA-06-2565       | -2.177                                                    |
| TCGA-06-2566       | -1.216                                                    |
| TCGA-06-2567       | -1.938                                                    |
| TCGA-06-2569       | -5.016                                                    |
| TCGA-06-2570       | -1.716                                                    |
| TCGA-08-0244       | -2.671                                                    |
| TCGA-08-0245       | -2.356                                                    |
| TCGA-08-0246       | -2.841                                                    |
| TCGA-08-0344       | -2.808                                                    |
| TCGA-08-0345       | -2.528                                                    |
| TCGA-08-0346       | -2.841                                                    |
| TCGA-08-0347       | -2.225                                                    |
| TCGA-08-0348       | -2.81                                                     |
| TCGA-08-0349       | -2.781                                                    |
| TCGA-08-0350       | -3.155                                                    |
| TCGA-08-0351       | -2.567                                                    |
| TCGA-08-0352       | -1.58                                                     |
| TCGA-08-0353       | -2.443                                                    |
| TCGA-08-0354       | -3.355                                                    |
| TCGA-08-0355       | -2.656                                                    |
| TCGA-08-0356       | -2.303                                                    |
| TCGA-08-0357       | -1.241                                                    |
| TCGA-08-0358       | -2.799                                                    |
| TCGA-08-0359       | -1.575                                                    |
| TCGA-08-0360       | -3.832                                                    |
| TCGA-08-0373       | -2.755                                                    |
| TCGA-08-0375       | -2.414                                                    |
| TCGA-08-0380       | -1.825                                                    |
| TCGA-08-0385       | -3.023                                                    |
| TCGA-08-0386       | -2.758                                                    |
| TCGA-08-0389       | -2.99                                                     |
| TCGA-08-0390       | -3.096                                                    |
| TCGA-08-0392       | -4.411                                                    |
| TCGA-08-0509       | -2.024                                                    |
| TCGA-08-0510       | -1.691                                                    |
| TCGA-08-0511       | -1.559                                                    |
| TCGA-08-0512       | -3.694                                                    |
| TCGA-08-0514       | -2.355                                                    |
| TCGA-08-0516       | -1.787                                                    |
| TCGA-08-0517       | -0.867                                                    |
| TCGA-08-0518       | -1.941                                                    |
| TCGA-08-0520       | -2.38                                                     |
| TCGA-08-0521       | -2.26                                                     |
| TCGA-08-0522       | -3.848                                                    |
| TCGA-08-0524       | -3.303                                                    |
| TCGA-08-0525       | -2.018                                                    |

(continued)

SUPPLEMENTARY TABLE S1. (CONTINUED)

| <i>Participant</i> | <i>AgilentG4502A_07<br/>log2 tumor/normal ratio</i> |
|--------------------|-----------------------------------------------------|
| TCGA-08-0529       | -2.382                                              |
| TCGA-08-0531       | -1.732                                              |
| TCGA-12-0616       | -3.095                                              |
| TCGA-12-0618       | -2.768                                              |
| TCGA-12-0619       | -3.57                                               |
| TCGA-12-0620       | -4.864                                              |
| TCGA-12-0654       | -3.425                                              |
| TCGA-12-0656       | -1.206                                              |
| TCGA-12-0657       | -2.924                                              |
| TCGA-12-0670       | -3.038                                              |
| TCGA-12-0688       | -2.781                                              |
| TCGA-12-0692       | -2.748                                              |
| TCGA-12-0703       | -1.456                                              |
| TCGA-12-0707       | -1.991                                              |
| TCGA-12-0772       | -2.474                                              |
| TCGA-12-0773       | -1.986                                              |
| TCGA-12-0775       | -2.294                                              |
| TCGA-12-0776       | -2.32                                               |
| TCGA-12-0778       | -2.343                                              |
| TCGA-12-0780       | -1.616                                              |
| TCGA-12-0820       | -1.119                                              |
| TCGA-12-0821       | -3.244                                              |
| TCGA-12-0822       | -3.644                                              |
| TCGA-12-0826       | -2.083                                              |
| TCGA-12-0827       | -3.732                                              |
| TCGA-12-0828       | -2.671                                              |
| TCGA-12-0829       | -2.582                                              |
| TCGA-12-1088       | -2.493                                              |
| TCGA-12-1089       | -0.531                                              |
| TCGA-12-1090       | -1.637                                              |
| TCGA-12-1091       | -2.66                                               |
| TCGA-12-1092       | -2.374                                              |
| TCGA-12-1093       | -0.654                                              |
| TCGA-12-1094       | -1.226                                              |
| TCGA-12-1095       | -1.398                                              |
| TCGA-12-1096       | -2.067                                              |
| TCGA-12-1097       | -1.555                                              |
| TCGA-12-1099       | -1.551                                              |
| TCGA-12-1597       | -1.78                                               |
| TCGA-12-1598       | -2.528                                              |
| TCGA-12-1599       | -0.713                                              |
| TCGA-12-1600       | -1.72                                               |
| TCGA-12-1602       | -1.302                                              |
| TCGA-12-3644       | -4.354                                              |
| TCGA-12-3646       | -3.021                                              |
| TCGA-12-3648       | -2.83                                               |
| TCGA-12-3649       | -0.993                                              |
| TCGA-12-3650       | -1.348                                              |
| TCGA-12-3651       | -1.505                                              |
| TCGA-12-3652       | -1.968                                              |
| TCGA-12-3653       | -3.149                                              |
| TCGA-14-0736       | -1.486                                              |
| TCGA-14-0783       | -3.354                                              |
| TCGA-14-0786       | -1.901                                              |
| TCGA-14-0787       | -2.585                                              |
| TCGA-14-0789       | -3.578                                              |
| TCGA-14-0812       | -1.872                                              |
| TCGA-14-0813       | -3.795                                              |
| TCGA-14-0817       | -3.128                                              |
| TCGA-14-0865       | -1.337                                              |
| TCGA-14-0866       | -1.888                                              |
| TCGA-14-0867       | -3.268                                              |

SUPPLEMENTARY TABLE S1. (CONTINUED)

| <i>Participant</i> | <i>AgilentG4502A_07<br/>log2 tumor/normal ratio</i> |
|--------------------|-----------------------------------------------------|
| TCGA-14-0871       | -5.327                                              |
| TCGA-14-1034       | -1.577                                              |
| TCGA-14-1037       | -1.158                                              |
| TCGA-14-1396       | -2.084                                              |
| TCGA-14-1401       | -0.874                                              |
| TCGA-14-1402       | -1.443                                              |
| TCGA-14-1451       | -1.366                                              |
| TCGA-14-1452       | -2.019                                              |
| TCGA-14-1453       | -2.49                                               |
| TCGA-14-1454       | -1.854                                              |
| TCGA-14-1455       | -1.105                                              |
| TCGA-14-1456       | -1.951                                              |
| TCGA-14-1459       | -2.332                                              |
| TCGA-14-1794       | -2.442                                              |
| TCGA-14-1795       | -1.357                                              |
| TCGA-14-1821       | -1.897                                              |
| TCGA-14-1823       | -2.112                                              |
| TCGA-14-1825       | -2.351                                              |
| TCGA-14-1827       | -1.339                                              |
| TCGA-14-1829       | -2.524                                              |
| TCGA-14-2554       | -2.263                                              |
| TCGA-14-2555       | -3.397                                              |
| TCGA-14-3477       | -2.248                                              |
| TCGA-15-0742       | -2.191                                              |
| TCGA-15-1446       | -0.953                                              |
| TCGA-15-1447       | -1.355                                              |
| TCGA-15-1449       | -1.463                                              |
| TCGA-16-0846       | -1.43                                               |
| TCGA-16-0848       | -2.176                                              |
| TCGA-16-0849       | -2.094                                              |
| TCGA-16-0850       | -2.205                                              |
| TCGA-16-0861       | -1.321                                              |
| TCGA-16-1045       | -1.273                                              |
| TCGA-16-1047       | -1.93                                               |
| TCGA-16-1055       | -1.802                                              |
| TCGA-16-1056       | -1.182                                              |
| TCGA-16-1060       | -1.215                                              |
| TCGA-16-1062       | -2.231                                              |
| TCGA-16-1063       | -1.313                                              |
| TCGA-16-1460       | -1.499                                              |
| TCGA-19-0955       | -1.207                                              |
| TCGA-19-0957       | -1.942                                              |
| TCGA-19-0960       | -2.035                                              |
| TCGA-19-0962       | -1.375                                              |
| TCGA-19-0963       | -0.639                                              |
| TCGA-19-0964       | -1.486                                              |
| TCGA-19-1385       | -1.939                                              |
| TCGA-19-1386       | -0.502                                              |
| TCGA-19-1387       | -1.095                                              |
| TCGA-19-1388       | -1.209                                              |
| TCGA-19-1389       | -2.831                                              |
| TCGA-19-1390       | -2.127                                              |
| TCGA-19-1392       | -3.051                                              |
| TCGA-19-1786       | -1.083                                              |
| TCGA-19-1787       | -2.65                                               |
| TCGA-19-1791       | -1.185                                              |
| TCGA-19-2620       | -0.53                                               |
| TCGA-19-2621       | -1.324                                              |
| TCGA-19-2623       | -2.741                                              |
| TCGA-19-2624       | -1.068                                              |
| TCGA-19-2625       | -2.516                                              |

(continued)

SUPPLEMENTARY TABLE S1. (CONTINUED)

---

| <i>Participant</i> | <i>AgilentG4502A_07</i><br><i>log2 tumor/normal ratio</i> |
|--------------------|-----------------------------------------------------------|
| TCGA-19-2629       | -1.182                                                    |
| TCGA-26-1438       | -2.263                                                    |
| TCGA-26-1440       | -1.619                                                    |
| TCGA-26-1443       | -1.937                                                    |
| TCGA-26-1799       | -1.459                                                    |
| TCGA-27-1830       | -1.309                                                    |
| TCGA-27-1831       | -2.957                                                    |
| TCGA-27-1832       | -1.734                                                    |
| TCGA-27-1833       | -0.847                                                    |
| TCGA-27-1836       | -1.092                                                    |
| TCGA-27-1837       | -1.411                                                    |
| TCGA-27-1838       | -2.312                                                    |
| TCGA-27-2518       | -1.006                                                    |
| TCGA-27-2519       | -2.892                                                    |
| TCGA-27-2521       | -2.036                                                    |
| TCGA-27-2523       | -1.819                                                    |
| TCGA-27-2524       | -2.542                                                    |
| TCGA-27-2526       | -1.387                                                    |
| TCGA-27-2527       | -2.114                                                    |
| TCGA-27-2528       | -1.394                                                    |
| TCGA-28-1745       | -3.084                                                    |
| TCGA-28-1746       | -0.695                                                    |
| TCGA-28-1747       | -1.374                                                    |
| TCGA-28-1750       | -1.563                                                    |
| TCGA-28-1751       | -1.037                                                    |
| TCGA-28-1752       | -0.537                                                    |
| TCGA-28-1753       | -1.914                                                    |
| TCGA-28-1755       | -2.891                                                    |
| TCGA-28-1756       | -0.837                                                    |
| TCGA-28-1757       | -0.506                                                    |
| TCGA-28-1760       | -0.986                                                    |
| TCGA-28-2502       | -1.854                                                    |
| TCGA-28-2509       | -2.025                                                    |
| TCGA-28-2513       | -1.689                                                    |
| TCGA-28-2514       | -1.213                                                    |
| TCGA-32-1970       | -2.006                                                    |
| TCGA-32-1976       | -2.542                                                    |
| TCGA-32-1982       | -2.543                                                    |
| TCGA-32-1986       | -2.298                                                    |
| TCGA-32-2615       | -1.825                                                    |
| TCGA-32-2616       | -1.058                                                    |
| TCGA-32-2632       | -2.521                                                    |
| TCGA-32-2634       | -1.18                                                     |
| TCGA-32-2638       | -2.483                                                    |
| TCGA-41-2571       | -2.71                                                     |
| TCGA-41-2573       | -0.658                                                    |
| TCGA-41-2575       | -1.759                                                    |
| TCGA-41-3392       | -0.906                                                    |

---

ClustalW (v1.4) multiple sequence alignment

5 Sequences Aligned                    Alignment Score = 3511  
Gaps Inserted = 5                      Conserved Identities = 39

Pairwise Alignment Mode: Slow  
Pairwise Alignment Parameters:  
  Open Gap Penalty = 10.0    Extend Gap Penalty = 0.1  
  Similarity Matrix: blosum

Multiple Alignment Parameters:  
  Open Gap Penalty = 10.0    Extend Gap Penalty = 0.1  
  Delay Divergent = 40%      Gap Distance = 8  
  Similarity Matrix: blosum

Processing time: 0.3 seconds

```
sigma_immunogen 1 RQQIGNVVNQANLQLFWNMYNSRRDLINRPGTVPN---AKTLRCPVMLV 47
NDRG1           1 RQHIVNDMNPGLHLFINAYNSRRDLEIERPMPG---THTVTLQCPALLV 47
NDRG2           1 RNIITHAPNLDNIELYWNSYNRRDLNFER--GG-----DITLRCVMLV 43
NDRG3           1 RMHIAQDINQDNLQLFLNSYNGRRDLEIERPILGQNDNKSRTLKSTLLV 50
NDRG4           1 RQQIGNVVNQANLQLFWNMYNSRRDLINRPGTVPN---AKTLRCPVMLV 47
                * * * * . * * * * * * * * * * * * * * * * * *
sigma_immunogen 48 VGDNAPAEDGVVECNSKLDPTTTTFLKMADSGGLP 82
NDRG1           48 VGDSSPAVDVAVVECNSKLDPTKTTLLKMADCGGLP 82
NDRG2           44 VGDQAPHEDAVVECNSKLDPTQTSFLKMADSGGQP 78
NDRG3           51 VGDNSPAVEAVVECNSRLNPINTTLLKMADCGGLP 85
NDRG4           48 VGDNAPAEDGVVECNSKLDPTTTTFLKMADSGGLP 82
                *** . * . ***** * * * . ***** * * *
```

**SUPPLEMENTARY FIG. S1.** A ClustalW alignment of the immunogen that sigma used for generating NDRG4 polyclonal antibodies with NDRG family members. Significant homologies (>60% AA identities) were noted.
